# Supplementary material for: Plasma HER2 ( ERBB2 ) Copy Number Predicts Response to HER2-targeted Therapy in Metastatic Colorectal Cancer
Source: Oxford University Press journal article supplement (doi:10.1158/1078-0432.ccr-18-3389), 2019-02-26
Supplement: 10780432ccr183389-sup-210133_2_supp_5267381_pl2mdb.docx [file 10780432ccr183389-sup-210133_2_supp_5267381_pl2mdb.docx]

| **Supplemental Table 1. Summary of tissue and ctDNA results and response data** | | | | | | | | | | | | | | |
| --- | --- | --- | --- | --- | --- | --- | --- | --- | --- | --- | --- | --- | --- | --- |
| **Patient ID** | **PFS (weeks)** | **Best response (RECIST)** | **Best tumor shrinkage** | **Gene with Max MAF** | **Max MAF (G360)** | **Observed pCN** | **Adjusted pCN** | **IHC Score** | **% +ve cells** | **ISH mean Ratio** | **% +ve cells** | **GCN (qRT-PCR) Variation** | **RAS/RAF status in baseline ctDNA** | |
| 121001 | 29.2 | PR | -0.45 | TP53 | 32.31 | 121.7 | 187.23 | 3+ | 90 | 6 | 95 | 220 | ND | |
| 121002 | 14.8 | PD | -0.01 | TP53 | 55.82 | 5.06 | 4.74 | 2+ | 40 | 2.7 | 76 | 3.4 | ND | |
| 121003 | 39.2 | SD | -0.1 | TP53 | 0.62 | 2.97 | 80.47 | 3+ | 90 | 7 | 88 | 125 | ND | |
| 121004 | 7.6 | SD | -0.03 | APC | 12.23 | 5.86 | 17.77 | 2+ | 30 | 7 | 84 | 9.3 | ND | |
| 121006 | 22 | PR | -0.33 | APC | 11.85 | 26.98 | 107.40 | 3+ | 90 | 7 | 92 | 44 | ND | |
| 121008 | 7.2 | PD | 0.09 | TP53 | 34.9 | 14.64 | 20.10 | 3+ | 90 | 5 | 92 | 24.1 | KRAS G12V | |
| 121009 | 19.2 | SD | -0.08 | TP53 | 36.46 | 3.24 | 3.71 | 2+ | 30 | 2.3 | 54 | 2 | ND | |
| 121010 | 22.4 | PD | 0.09 | APC | 11.66 | 3.22 | 7.23 | 3+ | 50 | 5 | 90 | 7.6 | KRAS G12D | |
| 121011 | 2.8 | PD* | 0 | TP53 | 49.69 | 25.18 | 25.32 | 3+ | 90 | 7 | 92 | 44 | BRAF V600E | |
| 121012 | 16.4 | SD | 0.05 | TP53 | 2.62 | 4.39 | 47.52 | 3+ | 90 | 10 | 95 | 500 | ND | |
| 121013 | 2.8 | PD* | 0 | APC | 30.36 | 2.56 | 2.92 | 3+ | 60 | 3.3 | 56 | 3 | ND | |
| 121015 | 180.4 | CR | -1 | TP53 | 4.61 | 7.29 | 59.42 | 3+ | 90 | 9 | 94 | 320 | ND | |
| 121016 | 56.8 | PR | -0.67 | TP53 | 2.44 | 3.19 | 26.32 | 3+ | 90 | 7 | 94 | 21 | ND | |
| 121018 | 14.4 | SD-PR unconfirmed | -0.31 | TP53 | 32.84 | 3.52 | 4.32 | 2+ | 40 | 3.5 | 90 | 2.7 | ND | |
| 121019 | 23.2 | SD | -0.18 | PTEN | 14.92 | 15.6 | 47.57 | 3+ | 95 | 10 | 95 | 82 | ND | |
| 121023 | 44.4 | PR | -0.82 | APC | 28.14 | 121.55 | 214.42 | 3+ | 95 | 10 | 96 | 700 | ND | |
| 121024 | 7.2 | PD | 0.39 | TP53 | 3.66 | 3.86 | 27.38 | 3+ | 95 | 10 | 96 | 127 | ND | |
| 121026 | 14.8 | SD | -0.15 | APC | 30.29 | 4.6 | 6.30 | 2+ | 50 | 3.87 | 88 | 3 | ND | |
| 121028 | 17.6 | SD | -0.23 | APC | 38.71937 | 74.3 | 95.36 | 3+ | 95 | 10 | 90 | 50 | ND | |
| 121031 | 20.8 | SD-PR unconfirmed | -0.51 | APC | 29.95 | 23.1 | 37.23 | 3+ | 95 | 7 | 94 | 112 | ND | |
| 122014 | 15.6 | SD | -0.18 | TP53 | 53.21616 | 10.12 | 9.63 | 3+ | 80 | 5.95 | 94 | 4 | ND | |
| 122020 | 29.6 | PR | -0.64 | APC | 12.2 | 28.57 | 110.88 | 3+ | 95 | 10 | 96 | 70 | ND | |
| 122022 | 24 | SD-PR unconfirmed | -0.32 | RAF1 | 23.43 | 52.77 | 110.34 | 3+ | 95 | 7 | 96 | 158 | ND | |
| 122025 | 40 | PR | -0.42 | TP53 | 67.1 | 8.44 | 6.80 | 2+ | 70 | 4.65 | 82 | 9.6 | ND | |
| 122029 | 19.6 | SD | -0.28 | APC | 33.86 | 39.22 | 56.96 | 3+ | 80 | 10 | 70 | 100 | ND | |
| 124007 | 6.8 | PD | 0 | TP53 | 16.18 | 11.84 | 32.42 | 3+ | 90 | 7 | 96 | 69 | ND | |
| 125005 | 7.6 | PD | 0.73 | TP53 | 40.8483 | 3.08 | 3.32 | 2+ | 40 | 2.7 | 76 | 3.4 | ND | |
| 125017 | 22.4 | SD | -0.23 | APC | 67.92309 | 19.96 | 15.22 | 3+ | 95 | 4 | 90 | 19 | ND | |
| PD = progressive disease; * clinical PD; SD = stable disease; PR = partial response; MAF = mutant allele fraction; | | | | | | | | | | | | | | |
| pCN = plasma copy number; ND = none detected; GCN = genomic copy number; ND = None detected | | | | | | | | | | | | | |  |
