# Supplementary material for: Plasma HER2 ( ERBB2 ) Copy Number Predicts Response to HER2-targeted Therapy in Metastatic Colorectal Cancer
Source: Oxford University Press journal article supplement (doi:10.1158/1078-0432.ccr-18-3389), 2019-02-26
Supplement: 10780432ccr183389-sup-210133_2_supp_5267382_pl2mdj.docx [file 10780432ccr183389-sup-210133_2_supp_5267382_pl2mdj.docx]

| Supplemental Table 2. ROC analysis to determine adjusted plasma copy number cutoff | | | | | | |
| --- | --- | --- | --- | --- | --- | --- |
| Cutoff | **Sensitivity%** | **95% CI** | **Specificity%** | **95% CI2** | **Likelihood ratio** |
| < 3.118 | 12.5 | 0.316% to 52.65% | 100 | 83.16% to 100% |  |
| < 3.449 | 25 | 3.185% to 65.09% | 100 | 83.16% to 100% |  |
| < 3.643 | 37.5 | 8.523% to 75.51% | 100 | 83.16% to 100% |  |
| < 4.012 | 37.5 | 8.523% to 75.51% | 95 | 75.13% to 99.87% | 7.5 |
| < 4.367 | 37.5 | 8.523% to 75.51% | 90 | 68.3% to 98.77% | 3.75 |
| < 4.753 | 50 | 15.7% to 84.3% | 90 | 68.3% to 98.77% | 5 |
| < 5.694 | 50 | 15.7% to 84.3% | 85 | 62.11% to 96.79% | 3.333 |
| < 7.491 | 50 | 15.7% to 84.3% | 80 | 56.34% to 94.27% | 2.5 |
| < 9.154 | 50 | 15.7% to 84.3% | 75 | 50.9% to 91.34% | 2 |
| < 12.42 | 50 | 15.7% to 84.3% | 70 | 45.72% to 88.11% | 1.667 |
| < 17.66 | 50 | 15.7% to 84.3% | 65 | 40.78% to 84.61% | 1.429 |
| < 22.71 | 62.5 | 24.49% to 91.48% | 65 | 40.78% to 84.61% | 1.786 |
| < 25.82 | 75 | 34.91% to 96.81% | 65 | 40.78% to 84.61% | 2.143 |
| < 26.85 | 75 | 34.91% to 96.81% | 60 | 36.05% to 80.88% | 1.875 |
| < 29.9 | 87.5 | 47.35% to 99.68% | 60 | 36.05% to 80.88% | 2.188 |
| < 34.82 | 100 | 63.06% to 100% | 60 | 36.05% to 80.88% | 2.5 |
| < 42.37 | 100 | 63.06% to 100% | 55 | 31.53% to 76.94% | 2.222 |
| < 47.54 | 100 | 63.06% to 100% | 50 | 27.2% to 72.8% | 2 |
| < 52.27 | 100 | 63.06% to 100% | 45 | 23.06% to 68.47% | 1.818 |
| < 58.19 | 100 | 63.06% to 100% | 40 | 19.12% to 63.95% | 1.667 |
| < 65.97 | 100 | 63.06% to 100% | 35 | 15.39% to 59.22% | 1.538 |
| < 83.94 | 100 | 63.06% to 100% | 30 | 11.89% to 54.28% | 1.429 |
| < 101.4 | 100 | 63.06% to 100% | 25 | 8.657% to 49.1% | 1.333 |
| < 108.9 | 100 | 63.06% to 100% | 20 | 5.733% to 43.66% | 1.25 |
| < 110.6 | 100 | 63.06% to 100% | 15 | 3.207% to 37.89% | 1.176 |
| < 149.1 | 100 | 63.06% to 100% | 10 | 1.235% to 31.7% | 1.111 |
| < 200.8 | 100 | 63.06% to 100% | 5 | 0.1265% to 24.87% | 1.053 |
